# Supplementary material for: Assessing the influence of climate on wintertime SARS-CoV-2 outbreaks
Source: PubMed Central journal article supplement (PMC7870658; doi:10.1038/s41467-021-20991-1), 2021-02-08
Supplement: 41467_2021_20991_MOESM1_ESM.pdf [file 41467_2021_20991_MOESM1_ESM.pdf]

# Supplementary information: Assessing the influence of climate on wintertime SARS-CoV-2 outbreaks

Baker et al.

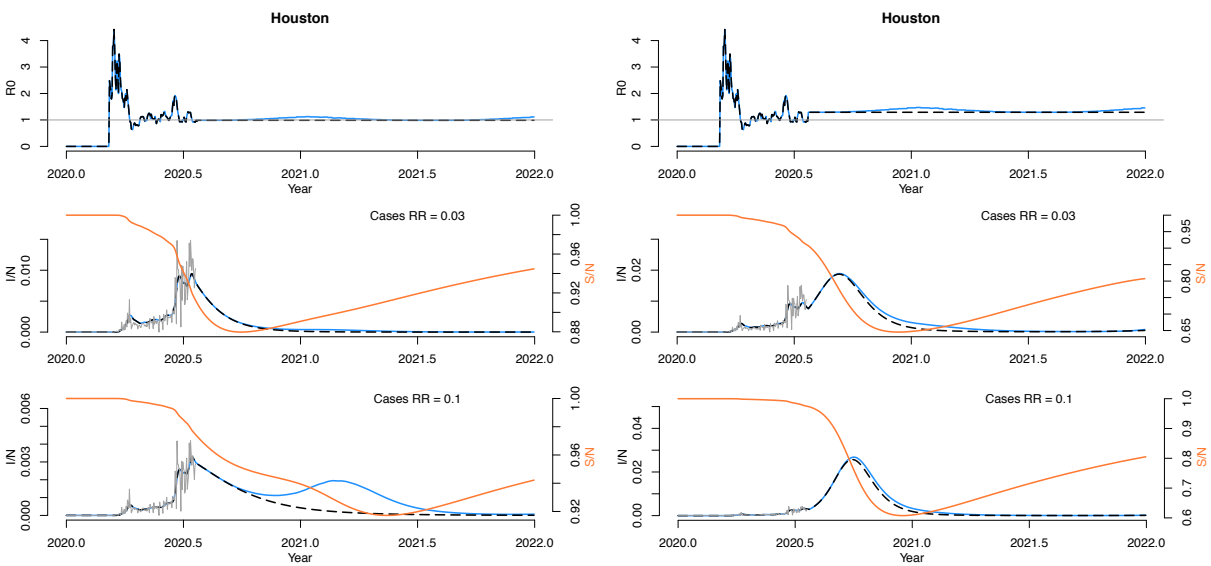

Supplementary Figure 1: **Scenarios for winter outbreaks in Houston.** Left and right column assumes a relative  $R_0$  reduction due to NPIs of 35% and 15% respectively. Middle row and lower row are scenarios assuming a 3% and 10% reporting rate. Cases are shown in grey. Proportion susceptible ( $S$ ) is shown in orange and proportion infected (infected =  $I$ / population =  $N$ ) is shown in blue.

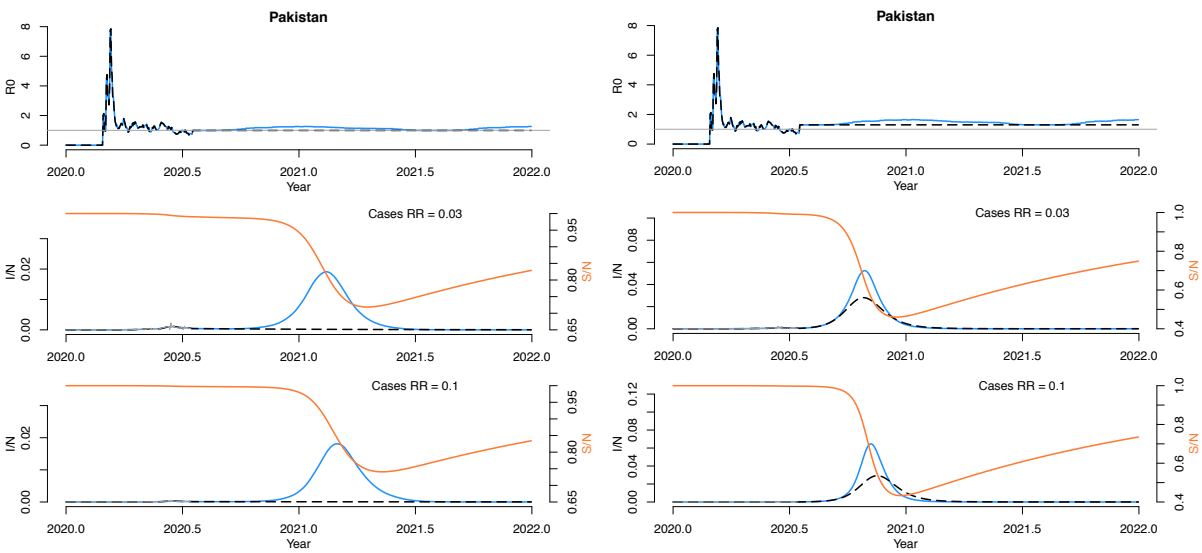

Supplementary Figure 2: **Scenarios for winter outbreaks in Pakistan.** Left and right column assumes a relative  $R_0$  reduction due to NPIs of 35% and 15% respectively. Middle row and lower row are scenarios assuming a 3% and 10% reporting rate. Cases are shown in grey. Proportion susceptible (S) is shown in orange and proportion infected (infected =  $I$ / population =  $N$ ) is shown in blue.

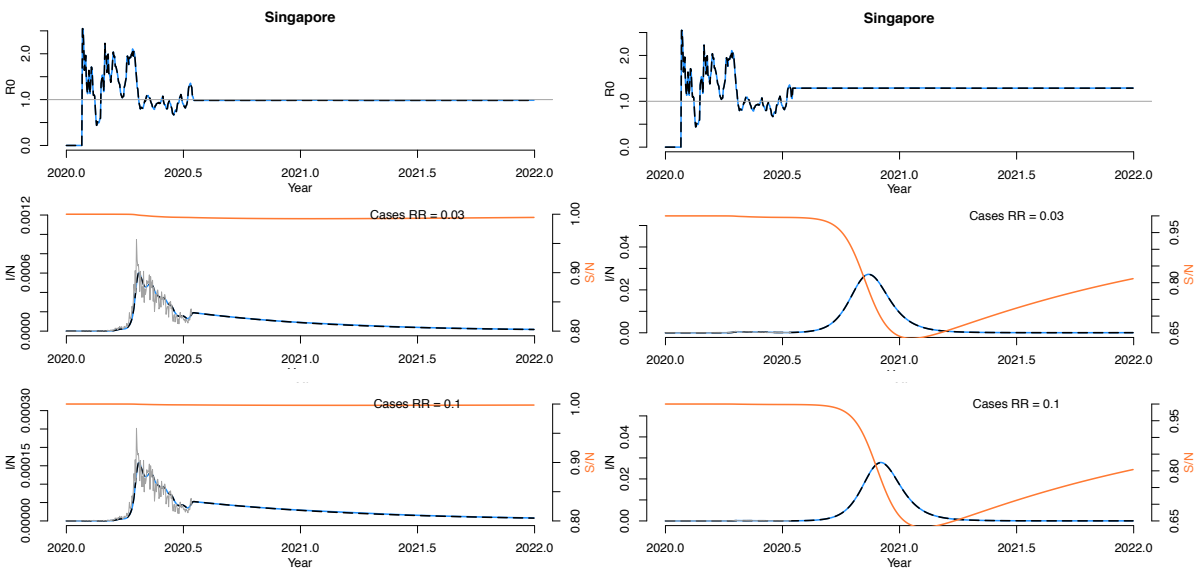

Supplementary Figure 3: **Scenarios for winter outbreaks in Singapore.** Left and right column assumes a relative  $R_0$  reduction due to NPIs of 35% and 15% respectively. Middle row and lower row are scenarios assuming a 3% and 10% reporting rate. Cases are shown in grey. Proportion susceptible (S) is shown in orange and proportion infected (infected =  $I$  / population =  $N$ ) is shown in blue.

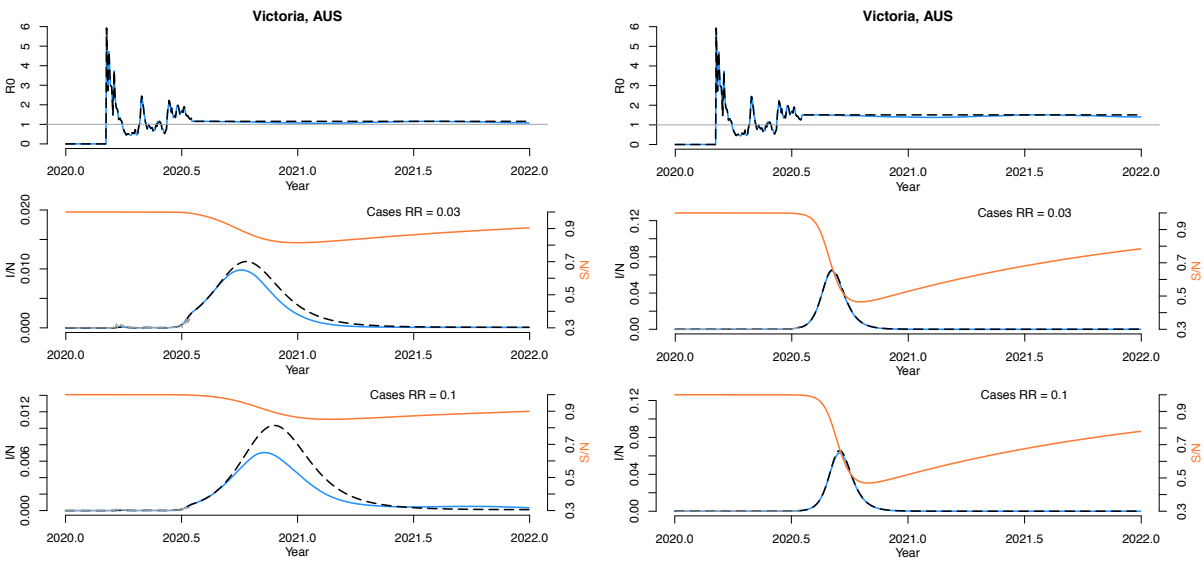

Supplementary Figure 4: **Scenarios for outbreaks in Victoria, Australia.** Left and right column assumes a relative  $R_0$  reduction due to NPIs of 35% and 15% respectively. Middle row and lower row are scenarios assuming a 3% and 10% reporting rate. Cases are shown in grey. Proportion susceptible ( $S$ ) is shown in orange and proportion infected (infected =  $I$  / population =  $N$ ) is shown in blue. Projections here show much larger case numbers than observed in the region post-July. A second lockdown, enacted in Australia in August 2020, substantially curbed the outbreak.

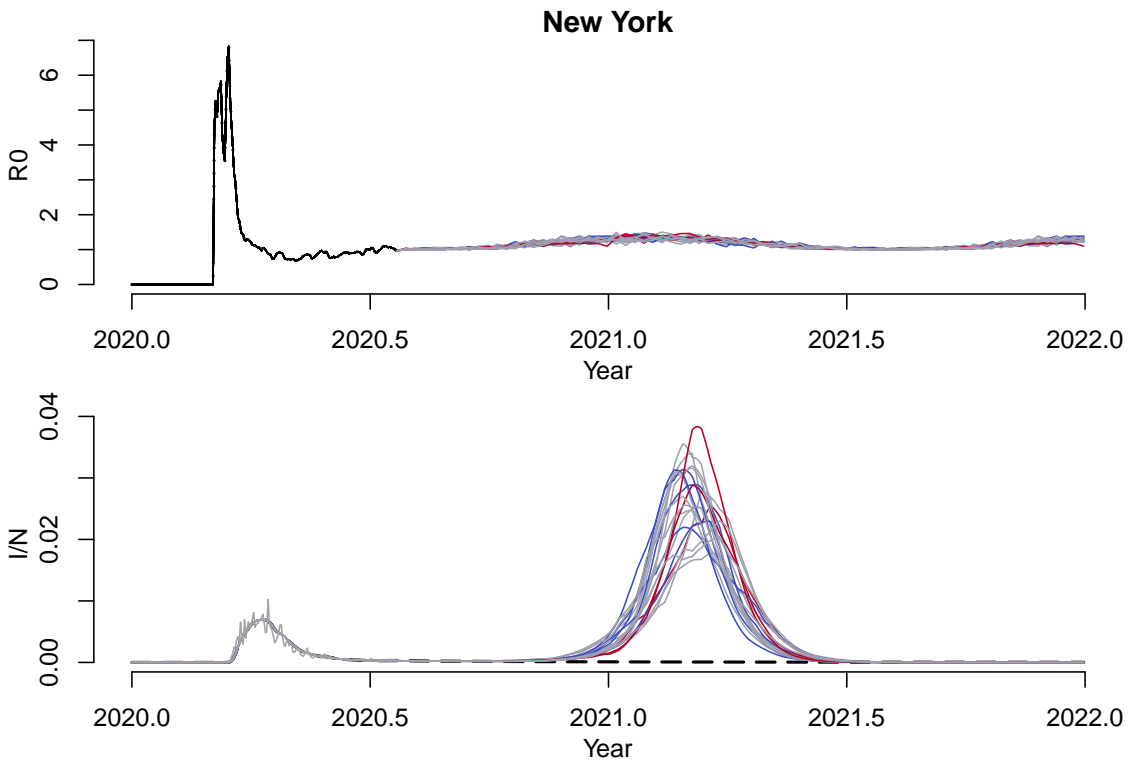

Supplementary Figure 5: **Influence of the north atlantic oscillation on New York outbreaks.** Outbreak simulations are run for New York using the prior 20 years of climate data (assuming a relative reduction in  $R_0$  of 35% and 3% reporting rate). Proportion infected (infected =  $I$ / population =  $N$ ) for each simulation are shaded by the NAO index where red is  $> 0.5$ , blue is  $< -0.5$  and grey is in between. Positive indexes correspond to slightly later peaks, and negative to earlier, however, the effect is not significant.

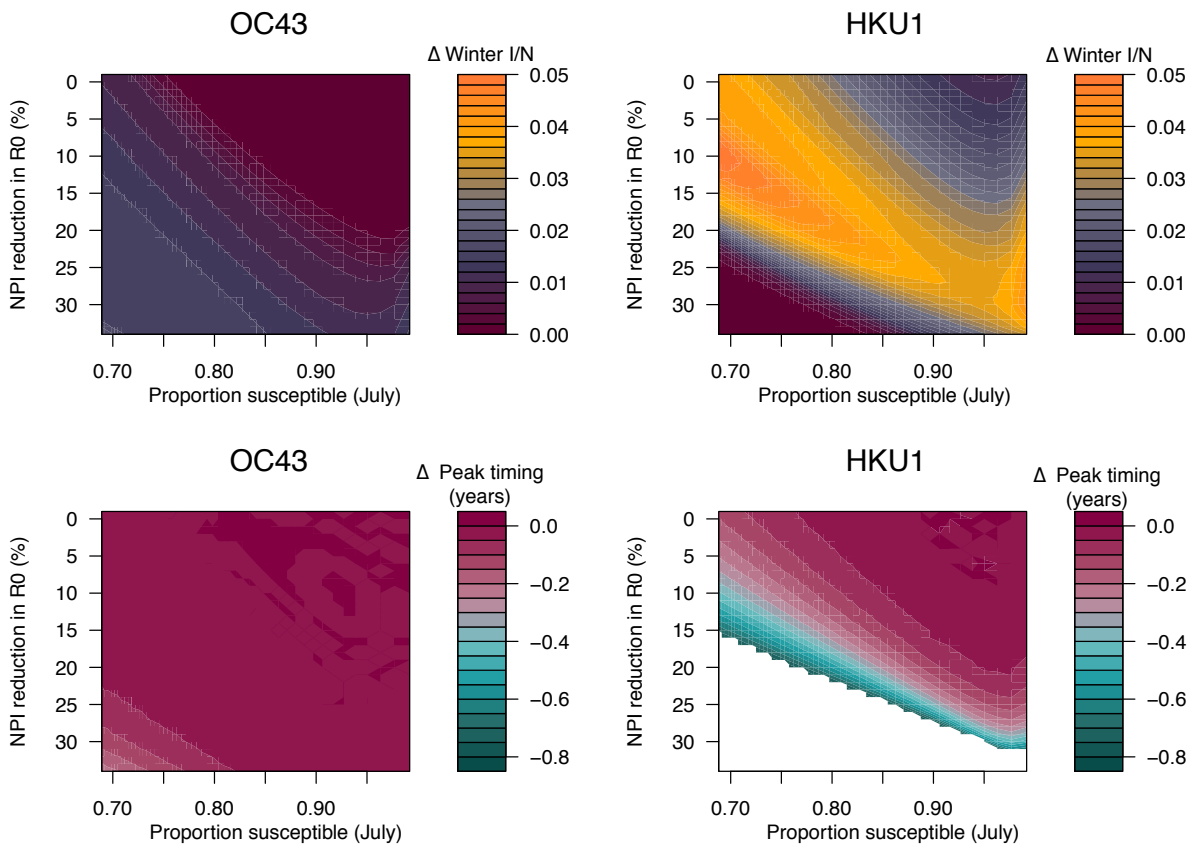

Supplementary Figure 6: **Impact of climate on peak size and timing, HKU1 and OC43 parameters.** Fig. 1 e,h recreated using the climate sensitivity of OC43 (Fig. 1e,h, using HKU1 params are reproduced here for comparison). I = infected and N = population.

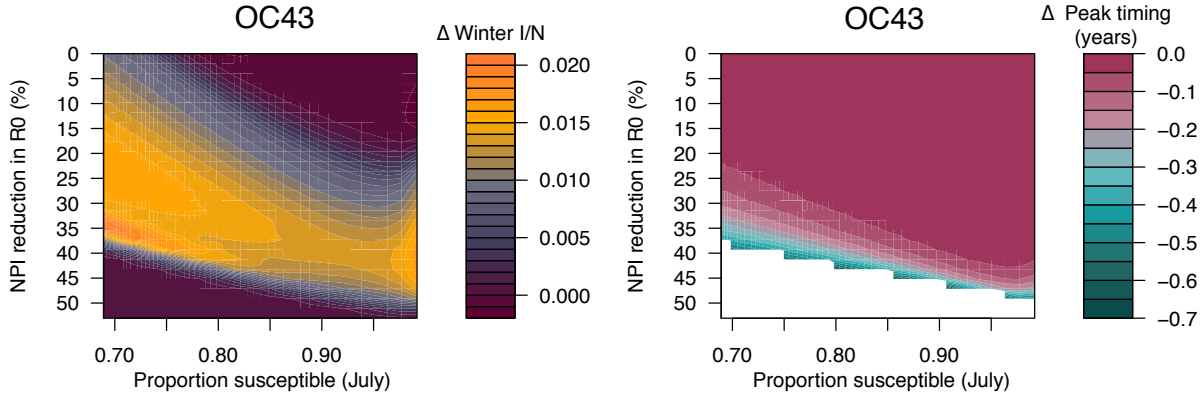

Supplementary Figure 7: **Impact of climate on peak size and timing using expanded range of NPI efficacy (0-55%), OC43 parameters.** The effect of varying the proportion susceptible in July and NPI reduction in  $R_0$  on the relative size of the wintertime peak proportion infected (infected =  $I$ / population =  $N$ ) in the climate versus constant scenario. The color scale is rescaled to match the maximum  $\Delta I/N$  i.e. the color scale does not match Fig. 5 and Fig 1e,h. The plot reveals a similar pattern to Fig. 1e,h, albeit with smaller maximum effect size.

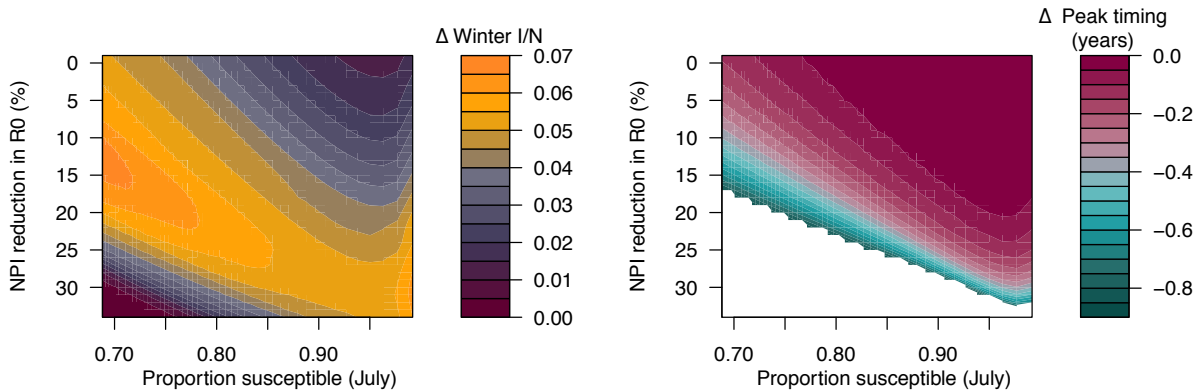

Supplementary Figure 8: **Impact of climate on peak size and timing with larger  $R_0$  range.** Fig. 1 e,h recreated using  $R_{0max} = 3$  and  $R_{0min} = 1.5$ . Climate sensitivity is based on HKU1.  $I/N$  is the proportion infected ( $I$  = infected/ $N$  = population)

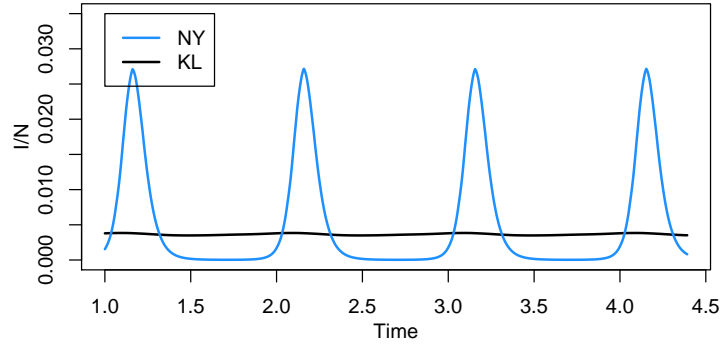

Supplementary Figure 9: **HKU1 model simulations for Kuala Lumpa and New York.** The model is run for 25 years to remove transient dynamics. Results present seasonal fluctuations in the proportion infected (infected =  $I$  / population =  $N$ ) for the endemic HKU1 infection.

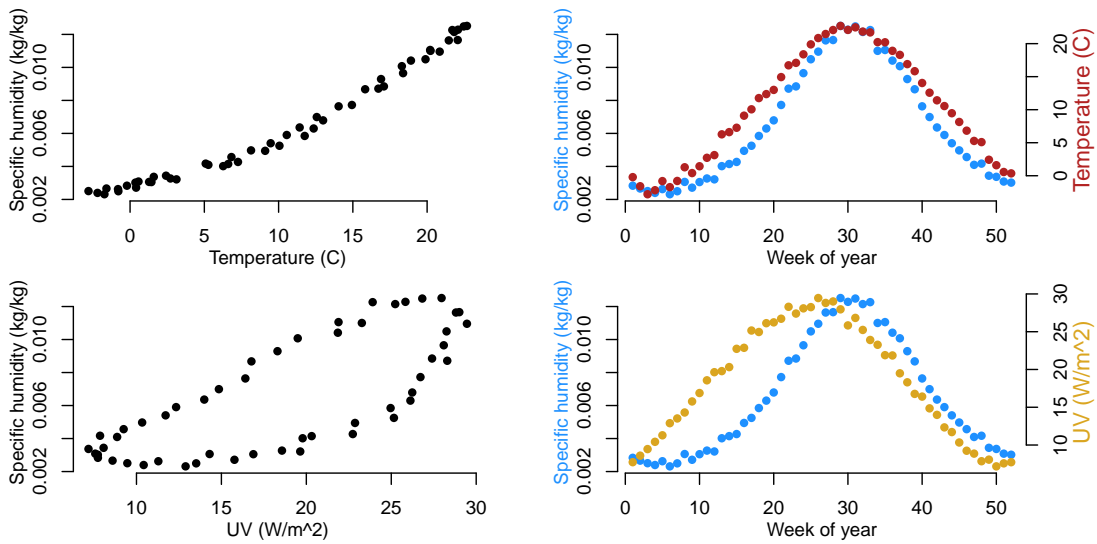

Supplementary Figure 10: **Correlation between specific humidity and temperature/UV.** 30 year average specific humidity, temperature and ultra-violet radiation (UV) for New York City. Temperature and specific humidity are highly correlated (98% correlation coefficient). UV and specific humidity show a lagged relationship (75% correlation).
